# Supplementary material for: What resources are used in emergency departments in rural sub-Saharan Africa? A retrospective analysis of patient care in a district-level hospital in Uganda
Source: PubMed Central journal article supplement — BMJ Open. 2018 Feb 24;8(2):e019024. doi: 10.1136/bmjopen-2017-019024 (PMC5855402; doi:10.1136/bmjopen-2017-019024), 2018-02-24
Supplement: bmjopen-2017-019024.draft_revisions.pdf [file bmjopen-2017-019024.draft_revisions.pdf]

# BMJ Open

BMJ Open is committed to open peer review. As part of this commitment we make the peer review history of every article we publish publicly available.

When an article is published we post the peer reviewers' comments and the authors' responses online. We also post the versions of the paper that were used during peer review. These are the versions that the peer review comments apply to.

The versions of the paper that follow are the versions that were submitted during the peer review process. They are not the versions of record or the final published versions. They should not be cited or distributed as the published version of this manuscript.

BMJ Open is an open access journal and the full, final, typeset and author-corrected version of record of the manuscript is available on our site with no access controls, subscription charges or pay-per-view fees (<http://bmjopen.bmj.com>).

If you have any questions on BMJ Open's open peer review process please email [editorial.bmjopen@bmj.com](mailto:editorial.bmjopen@bmj.com)

# BMJ Open

## Provider skills, medications and diagnostic studies used to care for patients in a rural Ugandan Emergency Department

|                                 |                                                                                                                                                                                                                                                                                                                                                                                                                                                                                                                                                                                                            |
|---------------------------------|------------------------------------------------------------------------------------------------------------------------------------------------------------------------------------------------------------------------------------------------------------------------------------------------------------------------------------------------------------------------------------------------------------------------------------------------------------------------------------------------------------------------------------------------------------------------------------------------------------|
| Journal:                        | <i>BMJ Open</i>                                                                                                                                                                                                                                                                                                                                                                                                                                                                                                                                                                                            |
| Manuscript ID                   | bmjopen-2017-019024                                                                                                                                                                                                                                                                                                                                                                                                                                                                                                                                                                                        |
| Article Type:                   | Research                                                                                                                                                                                                                                                                                                                                                                                                                                                                                                                                                                                                   |
| Date Submitted by the Author:   | 27-Aug-2017                                                                                                                                                                                                                                                                                                                                                                                                                                                                                                                                                                                                |
| Complete List of Authors:       | Bitter, Cindy; Saint Louis University, Surgery/Emergency Medicine<br>Rice, Brian; New York University Langone Medical Center, Emergency Medicine<br>Periyannayagam, Usha; harvard humanitarian initiative<br>Dreifuss, Bradley; University of Arizona Arizona Health Sciences Center, Emergency Medicine<br>Hammerstedt, Heather; CEPA-Idaho<br>Nelson, Sara; Maine Medical Center, Emergency Medicine<br>Bisanzo, Mark; University of Massachusetts System,<br>Maling, Samuel; Mbarara University of Science and Technology<br>Chamberlain, Stacey; University of Illinois at Chicago College of Medicine |
| <b>Primary Subject Heading</b>: | Emergency medicine                                                                                                                                                                                                                                                                                                                                                                                                                                                                                                                                                                                         |
| Secondary Subject Heading:      | Global health, Health services research                                                                                                                                                                                                                                                                                                                                                                                                                                                                                                                                                                    |
| Keywords:                       | procedural skills, medication formulary, radiology services, point-of-care ultrasound, sub-Saharan Africa, acute care                                                                                                                                                                                                                                                                                                                                                                                                                                                                                      |
|                                 |                                                                                                                                                                                                                                                                                                                                                                                                                                                                                                                                                                                                            |

SCHOLARONE™  
Manuscripts

only

**Title:** Provider skills, medications, and diagnostic studies used to care for patients in a rural Ugandan Emergency Department

**Authors:**

Cindy Bitter, MD, MPH

Department of Surgery, Division of Emergency Medicine, and the College for Public Health & Social Justice, Saint Louis University, Saint Louis MO, USA

Brian Rice, MD, MSc, DTM&H

Department of Emergency Medicine, New York University School of Medicine, New York NY, USA

Usha Periyanyagam, MD, MPH, MS

Harvard Humanitarian Initiative, Harvard University, Boston MA, USA

Bradley Dreifuss, MD

Department of Emergency Medicine, College of Medicine, and the Department of Health Promotion Sciences, Mel & Enid Zuckerman College of Public Health, University of Arizona, Tucson AZ, USA

Heather Hammerstedt, MD, MPH

CEPA-Idaho, Boise ID, USA

Sara W. Nelson, MD

Department of Emergency Medicine, Maine Medical Center, Portland ME, USA

Mark Bisanzo, MD \*\* corresponding author

Department of Surgery, Division of Emergency Medicine, University of Vermont

University of Vermont College of Medicine, Department of Surgery

Fletcher House 301

111 Colchester Ave

Burlington VT, USA

[mbisanzo@gmail.com](mailto:mbisanzo@gmail.com)

(802) 847-1237

Samuel Maling, MD

Dean, College of Medicine, Mbarara University of Science and Technology, Mbarara, Uganda

Stacey Chamberlain, MD, MPH

Department of Emergency Medicine and the Center for Global Health, University of Illinois at Chicago, Chicago IL, USA

**Keywords:** procedural skills, medication formulary, radiology services, point-of-care ultrasound, sub-Saharan Africa, acute care

**Word Count: 2911**

## Abstract

Objectives: To determine the most commonly utilized resources (provider procedural skills, medications, laboratory studies and imaging) needed to care for patients

Setting: A single Emergency Department of a district level hospital in rural Uganda

Participants: 26,710 patient visits

Results: Procedures were performed for 65.6% of patients, predominantly intravenous cannulation, wound care, bladder catheterization, and orthopedic procedures. Medications were administered to 87.6% of patients, most often pain medications, antibiotics, IV fluids, anti-malarials, nutritional supplements, and vaccinations. Laboratory testing was utilized for 85% of patients, predominantly malaria smears, rapid glucose testing, HIV assays, blood counts, urinalyses, and blood type. Radiology testing was performed for 17.3% of patients, including plain films, point of care ultrasound and formal ultrasound.

Conclusion: This study describes the skills and resources needed to care for a large prospective cohort of patients seen in a district hospital ED in rural SSA. It demonstrates the vast majority of patients were treated with a small formulary of critical medications and limited access to labs and imaging, but providers require a broad set of decision-making and procedural skills.

### Strengths and limitations of the study:

The study follows a large, multi-year cohort which accounts for seasonal variation in disease prevalence

Data reflects local resource limitations, additional tests and imaging may have been helpful to optimize patient outcomes

No assessment was made of the appropriateness of procedures and testing, or whether additional studies might have been indicated

**Introduction:**

Strengthening emergency and acute care infrastructure is a high priority for the World Health Organization,<sup>1</sup> and content experts have made important strides to develop a framework for emergency care development.<sup>2</sup> However, there are few longitudinal evaluations of facility level data that assess the epidemiology of patient presentations, the consumable and non-consumable resources used for care, and the clinical and procedural skills required to deliver emergency care in sub-Saharan Africa (SSA) on which to base these efforts.<sup>3 4 5 6</sup> The limited data that do exist are largely from urban areas or describe presentations over a short time frame, introducing possibility of bias, given the seasonal nature of some diseases thought to be prevalent in this area. It is estimated that 62% of the population of SSA lives in rural areas,<sup>7</sup> indicating that data from rural areas is essential to guide emergency care development.

The uncategorized burden of disease likely contributes to the lack of funding and slow progress of emergency medicine development in these countries.<sup>8</sup> While several emergency medicine training programs have been developed over the past decade<sup>9 10 11 12 13 14</sup> and the African Federation for Emergency Medicine has developed a Curriculum for Emergency Care training,<sup>15</sup> the educational content of these efforts has largely been drawn from international guidelines and expert consensus of foreign emergency physicians and local physicians providing emergency care in these settings.

Lack of information regarding the most frequently utilized procedural skills and the resources required to care for acutely ill and injured patients hinders the development of emergency care

1  
2  
3 delivery and training in low resource settings. This study describes the resources and clinical  
4 skills utilized to care for a large, longitudinal cohort of patients presenting to a not-for-profit  
5 district hospital in rural Uganda. It addresses some of the research gaps in service delivery,  
6 resource utilization and training needs necessary to ensure effective emergency care as identified  
7 in a recent consensus statement.<sup>16</sup> This knowledge could inform required training and protocols,  
8 as well as emergency care formulary development, and checklists of useful laboratory resources  
9 and diagnostic imaging modalities to refine the proposed framework for emergency care  
10 development in SSA.<sup>17</sup>  
11  
12  
13  
14  
15  
16  
17  
18  
19  
20  
21  
22  
23

## 24 **Methods**

### 25 *Study design*

26  
27  
28  
29  
30  
31  
32  
33  
34 This is a retrospective analysis of a prospectively collected data from a quality assurance  
35 database of patients seen at the Karoli Lwanga Hospital ED from November 2009 through  
36 February 2015. The database includes demographic information, as well as diagnostic studies,  
37 medications administered, and procedures performed during ED care. Labs, imaging and  
38 procedures ordered in the ED but delayed until the patient was admitted to the ward were  
39 included, so the numbers reflect the resources that providers felt were needed to care for the  
40 patients, regardless of whether the resources were immediately available in the emergency  
41 department.  
42  
43  
44  
45  
46  
47  
48  
49  
50  
51  
52

### 53 *Background and Study Setting*

1  
2  
3  
4  
5  
6 Karoli Lwanga Hospital is a private, not-for-profit district hospital located in the town of  
7  
8 Nyakibale, in the Rukungiri district of rural southwest Uganda. The district covers 1445 square  
9  
10 kilometers, and the 2012 census listed 321,300 persons. Life expectancy is 50 years, compared to  
11  
12 a national figure of 58.7 years. The HIV prevalence rate is 8.7% compared to a national rate of  
13  
14 7.2%. The maternal mortality rate is 474 per 100,000 live births, compared to a national rate of  
15  
16 440 per 100,000. The infant mortality rate is 76 per 1000 live births, compared to national rate of  
17  
18 45 per 1000. There are 2 district hospitals in the area, 63 health centers, and 17 private clinics.  
19  
20  
21 The nearest referral hospital is in Mbarara, some 110 km away from Nyakibale.<sup>18 19</sup>  
22  
23  
24  
25  
26

27 Karoli Lwanga Hospital has a six-bed ED with an average census of 500 patients per month. The  
28  
29 ED is located centrally in the hospital, adjacent to most wards. The outpatient department (OPD)  
30  
31 operates 9 am to 5 pm Monday through Friday and from 8 am until noon on Saturday.  
32  
33

34 Ambulatory patients are informally triaged, usually by a nurse or clinical officer, and may be  
35  
36 referred to the ED based on chief complaint or concerning signs or symptoms noted on patient  
37  
38 evaluation. Patients who are non-ambulatory, severely ill, or acutely injured are seen in the ER  
39  
40 directly, as are those arriving during hours when OPD is closed. The ED hours varied during the  
41  
42 time of the study, but always began at 8 am and extended until at least 10 pm. For the past  
43  
44 several years, the ED sees patients between 8 am and 2 am.  
45  
46  
47  
48  
49

50  
51 The ED is staffed by non-physician clinicians locally known as Emergency Care Practitioners  
52  
53 (ECPs); these are nurses who are enrolled in or have completed a two-year training program in  
54  
55 emergency care. During the period of the study, ECPs transitioned from full-time supervision by  
56  
57  
58  
59  
60

1  
2  
3 EM board-certified/board eligible physicians to more independent patient care with supervision  
4  
5 by senior-level ECPs and intermittent supervision by EM physicians. This training program and  
6  
7 care delivery model have been described elsewhere.<sup>20 21</sup> Hospital-based Ugandan physicians  
8  
9 were on call for consultation for severely ill patients being admitted and major acute surgical  
10  
11 emergencies.  
12  
13

#### 14 15 16 17 *Data collection and Analysis* 18

19  
20  
21  
22 The study population includes all ED patient visits from November 14, 2009 through February  
23  
24 28, 2015. The start date reflects the initial day that data was collected on ED patients, which was  
25  
26 approximately 4 months after the initial training of the ECPs began. Data were charted by ECPs  
27  
28 on a structured written chart, which was entered into the quality assurance database by a trained  
29  
30 research assistant at the time of ED disposition. Additionally, during most of the time period, the  
31  
32 paper charts were scanned and securely saved as part of the QA processes. The QA database  
33  
34 tracked 31 fields including demographics, vital signs, chief complaint, lab studies, imaging,  
35  
36 medications administered, procedures performed, final diagnosis, disposition and condition on  
37  
38 discharge. As this is the first program to utilize task-shifting for provision of emergency care in  
39  
40 SSA, the QA database was created to monitor patient presentations and outcomes, to better  
41  
42 characterize acute care needs, and to improve program operations and educational content.  
43  
44  
45  
46  
47  
48  
49

50  
51 Data collection initially utilized Microsoft Excel (Microsoft, Redmond WA, USA) and was  
52  
53 transitioned to Microsoft Access in March 2012. The database was de-identified prior to  
54  
55 analysis. Data were merged and analyzed in Stata Statistical Software Version 13 (Stata  
56  
57  
58  
59  
60



1  
2  
3 Statistical Software: Release 13, College Station, TX: StataCorp LP). The data was formatted  
4  
5 and cleaned, and the variables of interest were abstracted from the general database prior to  
6  
7 analysis by a single researcher. Descriptive tables of the most common skills and resources were  
8  
9 created.  
10  
11

### 12 13 14 15 *Ethical review*

16  
17  
18  
19  
20 This study was approved by the Mbarara University of Science and Technology Institutional  
21  
22 Review Board, the Uganda National Council for Science and Technology, and University of  
23  
24 Massachusetts Institutional Review Board (reference number HS 1405). Local approval was  
25  
26 obtained from the medical superintendent of the hospital.  
27  
28  
29  
30

### 31 **Results**

32  
33  
34  
35  
36 The cohort includes a total of 26,710 patient visits. Males accounted for 14,720 (55.1%) visits.  
37  
38 Pediatric patients under 5 years of age were 20.5% of total visits, and patients aged 5-17 were  
39  
40 16.2% of visits. Adults 18-65 years accounted for 50.6% of visits, and elders over 65 accounted  
41  
42 for 12.4% of visits. (Table 1)  
43  
44  
45  
46  
47

48 One or more procedures were performed during 17,509 (65.6%) patient visits, with a total of  
49  
50 22,729 procedures performed. Multiple procedures were required for 3601 (14.8%) patient visits  
51  
52 with a mean of 1.3 and a maximum of 7 procedures among those who required a procedure. The  
53  
54 most common procedure performed was IV cannulation. Wound care procedures were next,  
55  
56  
57  
58  
59  
60

1  
2  
3 followed by bladder catheterization, splinting and immobilization, procedural sedation, lumbar  
4  
5 punctures, and incision and drainage of abscesses. (Table 2).  
6  
7  
8  
9

10 A total of 73,317 doses of medications were administered. Medications were used for 23,401  
11  
12 (87.6%) patient visits, with 20,705 (77.5%) receiving more than one medication. The most  
13  
14 common class of medications used was analgesics, including acetaminophen, non-steroidal anti-  
15  
16 inflammatory, and opioid analgesics. The next most common class prescribed was antibiotics,  
17  
18 followed by antimalarials, intravenous fluids, and nutritional supplements. Approximately 1800  
19  
20 medications could not be classified due to misspellings or non-standard abbreviations.  
21  
22  
23

24 Medication categories are listed in Table 3, and examples of medications by category are listed  
25  
26 in Table 4. Specific medications given to more than 0.5% of the patient cohort are listed in Table  
27  
28  
29  
30  
31  
32  
33  
34  
35  
36  
37  
38  
39  
40  
41  
42  
43  
44  
45  
46  
47  
48  
49  
50  
51  
52  
53  
54  
55  
56  
57  
58  
59  
60

Laboratory tests were ordered for 22,708 (85.0%) patient visits, with a total of 38,378 studies  
being performed. The most common study was malaria testing, done in 14,440 (54.0%) patient  
visits. Bedside glucose was checked in 5666 (21.2%) patient visits. HIV testing was done in  
5195 (19.4%) patient visits with CD4 testing for 465 (1.7%). Hemoglobin was run for 4108  
(15.4%) patient visits. Urinalysis was performed for 3062 (11.5%) patient visits. Blood type was  
checked for 1366 (5.1%) patient visits. (Table 6)

Radiology studies were performed for 4630 (17.3%) patient visits. Plain films were performed or  
ordered on 1864 (7.0%) patient visits. The most common X-ray was a chest X-ray, done for  
1071 patient visits (4.0% of the cohort, 45.6% of all plain films requested.) Other X-rays

1  
2  
3 included 477 lower and 275 upper extremity films, 89 pelvis films, 88 skull films, and 73  
4  
5 abdominal films. Plain film radiography was available only when a radiology technician was  
6  
7 present, mostly weekday business hours, but with some call-in capacity on evenings and  
8  
9 weekends. Point of care ultrasound (POCUS) was performed on 2194 (8.2%) patient visits  
10  
11 including 417 FAST exams, 139 abdominal studies, 107 echocardiograms, and 73  
12  
13 transabdominal exams for obstetric or gynecological indications. Formal ultrasound imaging by  
14  
15 the hospital radiology technician was requested for 998 (3.7%) patient visits. (Table 7)  
16  
17  
18  
19  
20  
21  
22  
23  
24

## 25 **Limitations**

26  
27  
28  
29 This is a single center study in rural Uganda with a unique training program that was developed  
30  
31 after a needs assessment of the burden of disease,<sup>22</sup> but which took into account resource  
32  
33 limitations at Karoli Lwanga Hospital. Thus, it is possible our analysis failed to document  
34  
35 potentially useful resources that were not available, thus were not part of the ECPs training.  
36  
37 Other analyses of smaller portions of this data set looking at common diagnosis can help temper  
38  
39 this limitation to some degree.<sup>23</sup> Practice patterns and proficiencies of the ECPs may not be  
40  
41 representative of other clinicians. Increased availability of plain film radiography would likely  
42  
43 have increased the number of patients with imaging in the ED. CT imaging could aid in  
44  
45 managing head trauma and some abdominal injuries but is not available at the site, however, this  
46  
47 is true in most district hospitals in SSA. Likewise, there may be additional laboratory tests that  
48  
49 would be useful but were not available routinely during study period or were subject to “stock-  
50  
51 outs” of necessary reagents. While we did record tests ordered but not completed, if ECPs were  
52  
53  
54  
55  
56  
57  
58  
59  
60

1  
2  
3 aware of the stock-out, they may not have ordered a test even if they felt was indicated. Given  
4  
5 the retrospective nature of this review, we do not have a way of controlling for this lack of  
6  
7 ordering due to knowledge of stock-outs.  
8  
9

10  
11  
12 Free text entry of data by non-medically trained research assistants resulted in a small amount of  
13  
14 data being lost due to misspelling or incorrect transcription. Modifications to the data entry  
15  
16 process have since reduced such errors. Additionally, there was no gold standard arbitration  
17  
18 done to assess the true “need” for the interventions performed or to critique other interventions  
19  
20 that might have been indicated. Nonetheless, this provides a pragmatic assessment of the real-  
21  
22 world practice of emergency medicine at a district hospital in a rural area of SSA.  
23  
24  
25  
26  
27  
28

## 29 **Discussion**

30  
31  
32  
33  
34 This is a longitudinal cohort of 26,710 acutely ill patient visits cared for in a rural emergency  
35  
36 department in sub-Saharan Africa. The study builds on the work of previous authors in several  
37  
38 important ways. First, to our knowledge, this is largest data set of emergencies presenting to a  
39  
40 rural district hospital in a low-resource country. Additionally, we report detailed information on  
41  
42 procedures performed and resources used for care in this large cohort over a five-year period. To  
43  
44 deliver effective emergency care, ongoing research is required to further elucidate both training  
45  
46 and resource needs in resource limited settings. By documenting current practice patterns of  
47  
48 emergency care in a functional ED in rural Uganda, the data can inform training and resource  
49  
50 allocation for providers in similar settings.  
51  
52  
53  
54  
55  
56  
57  
58  
59  
60

1  
2  
3 In considering medical knowledge that should be included in emergency care training, the  
4 spectrum of diseases presenting acutely must be understood. Data from the Global Burden of  
5 Disease Study indicates an increasing contribution of non-communicable disease towards  
6 worldwide mortality,<sup>24</sup> but it is unknown how much these diseases contribute to the burden of  
7 emergencies in SSA. The data shows that ECPs cared for patients across all age ranges who  
8 presented with diverse complaints. Commonly utilized medications and diagnostic tests indicate  
9 that patients presented for emergency care with a broad array of communicable and non-  
10 communicable diseases. Our data suggests that even in rural areas with high rates of  
11 communicable diseases, non-communicable diseases contribute significantly to the need for  
12 acute care. Additionally, given the fact that analgesics were given to 31.4% of patients and  
13 approximately 2.5% of patients underwent procedural sedation, it can be inferred that the ECPs  
14 managed a large burden of acutely painful conditions. High rates of splinting and  
15 immobilization, as well as the number of FAST exams performed, indicate trauma care is a  
16 prominent component of emergency care in this setting. This is consistent with Uzochina et al's  
17 study from Nigeria and Wachira et al's data from Kenya.

18  
19  
20  
21  
22  
23  
24  
25  
26  
27  
28  
29  
30  
31  
32  
33  
34  
35  
36  
37  
38  
39  
40  
41 Skills such as x-ray interpretation and point of care ultrasound (POCUS) appear to be high yield,  
42 given x-rays were performed on 7.0% and POCUS on 8.2% of patient visits. POCUS has been  
43 shown in other studies to supplement limited radiography capacity and enhance safety of  
44 invasive procedures in resource limited settings.<sup>25 26 27</sup> The ECP training on POCUS has  
45 increased over time and is described elsewhere.<sup>28</sup>

1  
2  
3 The variety of procedures performed indicates that providers in the setting likely require a broad  
4 range of procedural skills. Peripheral IV access was the norm, but occasional patients required  
5 intra-osseous access or cannulation of the external jugular vein. In addition to the common  
6 procedures listed above, the ECPs are trained to perform paracenteses, thoracenteses, joint  
7 aspirations, and nerve blocks. While these procedures are required relatively infrequently, they  
8 are crucial for symptomatic relief, making the diagnosis, and guiding treatment for a significant  
9 proportion of patients seen in rural EDs in SSA. The ability to perform these procedures in a  
10 timely manner is required to deliver effective, quality emergency care.  
11  
12  
13  
14  
15  
16  
17  
18  
19  
20  
21  
22  
23

24 Resource allocation and preparation is the other essential component for effective emergency  
25 care delivery. Based on the proposed framework by Calvello et al., Karoli Lwanga Hospital  
26 should be an “intermediate facility”. In their framework, signal functions are defined as  
27 “lifesaving saving clinical interventions” and a consensus-based list of these functions was  
28 generated. While our study did not seek to specifically map which signal functions the ECPs  
29 carried out, comparing their list of signal functions with medications administered, procedures  
30 performed, and laboratory and diagnostic imaging testing used in our cohort, it is clear there is  
31 significant overlap between their framework and the real-world practice of emergency care in  
32 this setting.  
33  
34  
35  
36  
37  
38  
39  
40  
41  
42  
43  
44  
45  
46  
47

48 The medications most frequently used were pain medications, antibiotics, antimalarials, IV fluid  
49 boluses, nutritional supplements, respiratory, and cardiac medications. These medications are on  
50 the World Health Organization Model List of Essential Medications,<sup>29</sup> and are expected to be  
51 widely available. Approximately 13% of patients received vaccinations as part of their  
52  
53  
54  
55  
56  
57  
58  
59  
60

1  
2  
3 emergency care, highlighting another health-systems strengthening role of emergency care, in  
4 providing an additional venue for primary prevention. It is also encouraging to see some  
5 evidence that patient's pain was addressed, as pain assessment and management has been  
6 identified as a deficit in prior studies.<sup>30</sup>  
7  
8  
9  
10  
11

12  
13  
14  
15 There currently is no widely recognized list of essential emergency laboratory tests in low  
16 resource settings, although the WHO is currently in the process of developing consensus-based  
17 minimum package for this. From our data, it appears that point of care blood glucose testing,  
18 malaria smears (or rapid diagnostic malaria tests), assessment of hemoglobin, blood typing, HIV  
19 testing and fluid analysis (CSF, urine, pleural fluid, ascites, and joint aspirates) are all commonly  
20 used. While used to a lesser extent, our database and clinical experience indicated pregnancy  
21 testing is important in this setting as well. The ability to perform HIV screening is critical.  
22  
23  
24  
25  
26  
27  
28  
29  
30  
31  
32  
33  
34  
35  
36  
37  
38  
39  
40  
41  
42  
43  
44  
45  
46  
47  
48  
49  
50  
51  
52  
53  
54  
55  
56  
57  
58  
59  
60  
Uganda adopted a national guideline recommending opt-out testing in 2005,<sup>31</sup> but missed  
opportunities for early diagnosis and initiation of antiretroviral treatment in difficult to reach  
populations persist.<sup>32 33 34</sup> Due to stock-outs and lack of point of care testing performed by ECPs,  
this cohort of patients had a much lower rate of HIV testing than guidelines recommend. Testing  
for HIV in the acute care setting offers patients a pathway to access the HIV continuum of care  
and begin treatment at an earlier stage in the diagnosis, which in turn has been shown to make  
management more effective reduce HIV transmission and the future burden of disease.<sup>35 36</sup>  
Future directions for research include comparing data at this facility with training needs and  
resource allocation at other facilities in SSA. Additionally, formally assessing the use of signal  
functions in this cohort could help refine the framework proposed to guide emergency care  
implementation in SSA.

## Conclusions

This study tracks the resources utilized to diagnose, stabilize and treat a large cohort of consecutive patients seen in a not-for-profit, rural district ED in SSA. Analysis of the resources used and knowledge and skills applied to care for this patient cohort provide a rare glimpse of what emergency care delivery entails in rural SSA. The results of this study coupled with the previously developed framework to guide emergency care implementation will enable benchmarking and data-driven policy making for improvement of facility-based emergency care delivery in low resources settings within sub-Saharan Africa.

**Author Contributions:** CB, BR and UP performed data cleaning, statistical analysis and submission of this work. HH, SC, and MB inputted the data into the database. UP and SC conceived and designed the study and supervised all portions of the study. CB, SC and UP drafted the manuscript and all authors revised it. All authors take responsibility for the paper as a whole.

**Competing Interests:** The authors have no conflicts of interest to report

**Funding:** GEC is a non-profit organization and operates largely on private donations and small family foundation grants. The authors did not receive funding for this study.

**Data Sharing:** unpublished data is not be available to persons not affiliated with GEC



## References

- 1 Hirshon JM, Risko N, Calvello, EJ, et al. Health systems and services: the role of acute care. *Bull World Health Organ.* 2013; 91(5): 386-388.
- 2 Calvello E, Reynolds T, Hirshon JM, et al. Emergency care in sub-Saharan Africa: Results of a consensus conference. *AfJEM.* 2013; 3(1): 42-48.
- 3 Wen L, Char D. Existing infrastructure for the delivery of emergency care in post-conflict Rwanda: An initial descriptive study. *AfJEM.* 2011; 1: 57-61.
- 4 Uzoechina NS, Abiola AQ, Akodu BA, et al. Pattern and outcome of cases seen at the Adult Accident and Emergency Department of the Lagos University Teaching Hospital, Idi-Araba, Lagos. *Nig Q J Hosp Med.* 2012; 22(3): 209-15.
- 5 Wachira B, Wallis L, Geduld H. An analysis of the clinical practice of emergency medicine in public emergency departments in Kenya. *Emerg Med J.* 2012; 29: 473-476.
- 6 Periyannayagam U, Dreifuss B, Hammerstedt H, et al. Acute care needs in a rural sub-Saharan African Emergency Center: A retrospective analysis. *AfJEM.* 2012; 2(4): 151-158.
- 7 World Bank. Rural population. 2016. Retrieved from [www.data.worldbank.org/indicator/SP.RUR.TOTL.ZS](http://www.data.worldbank.org/indicator/SP.RUR.TOTL.ZS) on September 25, 2016.
- 8 Reynolds TA, Calvello EJB, Broccoli MC et al. AFEM consensus conference 2013 summary: Emergency care in Africa – Where are we now? *AfJEM.* 2014; 4(3):158-63.
- 9 Wen LS, Geduld HI, Nagurney JT, Wallis LA. Africa's First Emergency Medicine Training Program at the University of Cape Town/Stellenbosch University: History, Progress, and Lessons Learned. *Acad Emerg Med.* 2011;18(8): 868-871.
- 10 Kabeza A, George N, Nyundo M, Levine A. Development of emergency medicine in Rwanda. *AfJEM.* 2013; 3: 103-109.
- 11 Busse H, Azazh A, Teklu S, et al. Creating Change Through Collaboration: A Twinning Partnership to Strengthen Emergency Medicine at Addis Ababa University/Tikur Anbessa Specialized Hospital - A Model for International Medical Education Partnerships. *Acad Emerg Med.* 2013; 20: 1310-1318.
- 12 Martel J, Oteng R, Mould-Millman NK, et al. The development of sustainable emergency care in Ghana: physician, nursing, and prehospital care training initiatives. *J Emerg Med.* 2014; 47(4): 462-468.
- 13 Hammerstedt H, Maling S, Kasyaba R, et al. Addressing World Health Assembly Resolution 60.22: A Pilot Project to Create Access to Acute Care Services in Uganda. *Ann Emerg Med.* 2014; 64: 461-468.
- 14 A-Rahman NH, Jacquet GA. The state of emergency care in the Republic of the Sudan. *AfJEM.* 2014; 4(2):55-60.
- 15 African Federation for Emergency Medicine. Emergency Care Curriculum. Retrieved from [www.afem.info/resources/afem-curriculum/?id+73%27A](http://www.afem.info/resources/afem-curriculum/?id+73%27A) on November 28, 2016.
- 16 Calvello, EJB, Broccoli M, Risko N, et al. Emergency Care and Health Systems: Consensus-based Recommendations and Future Research Priorities. *Acad Emerg Med.* 2013; 20: 1278-1288.
- 17 Calvello, EJB, Tenner AG, Broccoli MC et al. Operationalising emergency care delivery in sub-Saharan Africa: consensus-based recommendations for healthcare facilities. *Emerg Med J.* 2016;33(8):573-80.
- 18 Uganda Bureau of Statistics 2016. The National Population and Housing Census 2014. Subcounty Report – Central Region. Available at [www.ubos.org](http://www.ubos.org)

- 1  
2  
3  
4  
5  
6  
7  
8  
9  
10  
11  
12  
13  
14  
15  
16  
17  
18  
19  
20  
21  
22  
23  
24  
25  
26  
27  
28  
29  
30  
31  
32  
33  
34  
35  
36  
37  
38  
39  
40  
41  
42  
43  
44  
45  
46  
47  
48  
49  
50  
51  
52  
53  
54  
55  
56  
57  
58  
59  
60
- 
- <sup>19</sup> United Nations Children's Fund. Uganda Country Statistics. Available at [www.unicef.org/infobycountry/uganda\\_statistics.html](http://www.unicef.org/infobycountry/uganda_statistics.html)
- <sup>20</sup> Hammerstedt H, Maling S, Kasyaba R, et al. Addressing World Health Assembly Resolution 60.22: A Pilot Project to Create Access to Acute Care Services in Uganda. *Ann Emerg Med.* 2014; 64: 461-468.
- <sup>21</sup> Rice B, Periyannayagam U, Chamberlain S, et al. Mortality in Children Under Five Receiving Nonphysician Clinician Emergency Care in Uganda. *Pediatrics.* 2016; 137(3): e20153201 doi: 10.1542/peds.2015.3201.
- <sup>22</sup> Periyannayagam U, Dreifuss B, Hammerstedt H, et al. Acute care needs in a rural sub-Saharan African Emergency Center: A retrospective analysis. *AfJEM.* 2012; 2(4): 151-158.
- <sup>23</sup> Chamberlain S, Stolz U, Dreifuss B, et al. Mortality Related to Acute Illness and Injury in Rural Uganda: Task Shifting to Improve Outcomes. *PLoS One.* 2015;10(4):e0122559.
- <sup>24</sup> GBD 2015 Mortality and Causes of Death Collaborators. Global, regional, and national life expectancy, all-cause mortality, and cause-specific mortality for 249 causes of death, 1980-2015: a systematic analysis for the Global Burden of Disease Study 2015. *Lancet.* 2016;388:1459-544.
- <sup>25</sup> Sipple S, Muruganandan K, Levine A, Shah S. Review article: Use of ultrasound in the developing world. *Int J Emerg Med.* 2011; 4: 72.
- <sup>26</sup> Chavez MA, Naithani N, Gilman RH et al. Agreement Between the World Health Organization Algorithm and Lung Consolidation Identified Using Point-of-Care Ultrasound for the Diagnosis of Childhood Pneumonia by General Practitioners. *Lung.* 2015; 193(4): 531-538.
- <sup>27</sup> Becker DM, Tafoya CA, Becker SL, Kruger GH, Tafoya MJ, Becker TK. The use of portable ultrasound devices in low- and middle-income countries: a systematic review of the literature. *Trop Med Int Health.* 2016; 21(3): 294-311.
- <sup>28</sup> Chanler-Berat J, Birungi A, Dreifuss B, Mbiine R. Typhoid intestinal perforation: Point-of-care ultrasound as a diagnostic tool in a rural Ugandan hospital. *AfJEM.* 2019;6(1):44-6.
- <sup>29</sup> World Health Organization. WHO Model List of Essential Medications. 2015.
- <sup>30</sup> Wachira et al, op cit.
- <sup>31</sup> Uganda Ministry of Health. Uganda national policy guidelines for HIV counseling and testing 2005. Retrieved from [www.who.int/hiv/pub.guidelines/uganda\\_art.pdf](http://www.who.int/hiv/pub.guidelines/uganda_art.pdf) on September 25, 2016.
- <sup>32</sup> Nakanjako D, Kanya M, Mayanja-Kizza H, Freers J, Whalen C, Katabira E. Acceptance of routine testing for HIV among adult patients at the medical emergency unit at a national referral hospital in Kampala, Uganda. *AIDS Behav.* 2007; 11(5): 753-758.
- <sup>33</sup> Larsson EC, Thorson A, Pariyo G, et al. Opt-out HIV testing during antenatal care: experiences of pregnant women in rural Uganda. *Health Policy and Planning.* 2012; 27(1): 69-75.
- <sup>34</sup> Obermeeyer CM, Bott S, Bayer R, Desclaux, Baggaley R, MATCH Study Group. HIV testing and care in Burkina Faso, Kenya, Malawi and Uganda: ethics on the ground. *BMC Int Health Hum Rights.* 2013; 13:6.
- <sup>35</sup> Donnell D, Baeten JM, Kiarie J, et al. Heterosexual HIV-1 transmission after initiation of antiretroviral therapy: a prospective cohort analysis. *Lancet.* 2010; 375(9831): 2092-2098.
- <sup>36</sup> Gardner EM, Haukoos JS. At the Crossroads of the HIV Care Continuum: Emergency Departments and the HIV Epidemic. *Ann Emerg Med.* 2015;66(1):79-81. doi:10.1016/j.annemergmed.2015.04.032.

Table 1  
Demographics

|                        | number | percent |
|------------------------|--------|---------|
| <b>Sex</b>             |        |         |
| Male                   | 14,720 | 55.1    |
| Female                 | 11,934 | 44.7    |
| Unspecified            | 56     | 0.2     |
| <b>Age</b>             |        |         |
| Children under 5 years | 5,478  | 20.5    |
| Pediatric 5-17 years   | 4,337  | 16.2    |
| Adult 18-65 years      | 13,510 | 50.6    |
| Elderly >65 years      | 3,305  | 12.4    |

Table 2  
Procedures

| Procedure               | Number | Percent of procedures | Percent of cohort |
|-------------------------|--------|-----------------------|-------------------|
| IV                      | 9,161  | 40.3                  | 34.2              |
| Wound care              | 7,246  | 31.9                  | 27.1              |
| Catheter                | 1,523  | 6.7                   | 5.7               |
| Splint & immobilization | 743    | 3.3                   | 2.8               |
| Procedural sedation     | 663    | 2.9                   | 2.5               |
| Lumbar puncture         | 513    | 2.3                   | 2.0               |
| I & D                   | 511    | 2.2                   | 1.9               |

Table 3  
Medications by Category

| Medication class | Doses  | Percent of medications given |
|------------------|--------|------------------------------|
| Analgesics       | 22,981 | 31.4                         |
| Antibiotics      | 14,486 | 19.8                         |
| Antimalarials    | 5,495  | 7.5                          |
| IV fluids        | 5,445  | 7.4                          |
| Nutritional      | 4,785  | 6.5                          |
| Respiratory      | 3,394  | 4.6                          |
| GI               | 2,584  | 3.5                          |
| CNS/Neuro        | 2,495  | 3.4                          |
| Cardiac          | 2,489  | 3.4                          |
| Vaccines         | 1,984  | 2.7                          |

Table 4

## Most Common Medications by Category

| Class                          | examples                      |                |                      |                                     |
|--------------------------------|-------------------------------|----------------|----------------------|-------------------------------------|
| <b>Analgesics</b>              | paracetamol/<br>acetaminophen | diclofenac     | tramadol             | Pethidine/<br>meperidine            |
| <b>Antibiotics</b>             | ceftriaxone                   | cloxacillin    | gentamicin           | metronidazole                       |
| <b>Antimalarials</b>           | artemether/<br>lumefantrine   | quinine        | artesunate           | sulfadoxine/<br>pyrimethamine       |
| <b>Nutritional supplements</b> | dextrose                      | ORT            | multivitamin         | ready-to-use<br>therapeutic<br>food |
| <b>Respiratory</b>             | oxygen                        | salbutamol     | cough<br>suppressant | nebulized<br>magnesium              |
| <b>GI</b>                      | omeprazole                    | metoclopramide | ranitidine           | bisacodyl                           |
| <b>CNS</b>                     | diazepam                      | haloperidol    | mannitol             | amitriptyline                       |
| <b>Cardiac</b>                 | furosemide                    | nifedipine     | aspirin              | digoxin                             |

Table 5

## Most Common Medications by Number of Doses

| Medication       | Doses  | Percent of medications |
|------------------|--------|------------------------|
| Paracetamol      | 14,697 | 20.0                   |
| Ceftriaxone      | 4,697  | 6.41                   |
| Diclofenac       | 4,508  | 6.2                    |
| Normal saline    | 3,672  | 5.0                    |
| Coartem          | 3,542  | 4.8                    |
| Tetanus vaccine  | 1,862  | 2.5                    |
| Tramadol         | 1,842  | 2.5                    |
| Quinine          | 1,775  | 2.4                    |
| Cloxacillin      | 1,686  | 2.3                    |
| Gentamicin       | 1,602  | 2.2                    |
| Ringers' lactate | 1,446  | 2.0                    |

Table 6  
Laboratory Testing

| Test                    | Number | Percent of cohort |
|-------------------------|--------|-------------------|
| Malaria                 | 14,473 | 54.2              |
| Capillary blood glucose | 5,703  | 21.4              |
| HIV test                | 5,213  | 19.5              |
| Hemoglobin              | 4,070  | 15.2              |
| Urinalysis              | 3,062  | 11.5              |
| Blood group             | 1,366  | 5.1               |



Table 7  
Imaging

|                  | Number of Studies | Percent of Imaging |
|------------------|-------------------|--------------------|
| <b>X-ray</b>     | 2441              |                    |
| Chest            | 1071              | 43.9               |
| Arm              | 477               | 19.5               |
| Leg              | 275               | 11.3               |
| Unspecified      | 150               | 6.1                |
| Pelvis           | 89                | 3.6                |
| Skull            | 88                | 3.6                |
| Abdomen          | 73                | 3.0                |
| <b>POCUS</b>     | 2289              |                    |
| Unspecified      | 1465              | 64.0               |
| FAST             | 417               | 18.2               |
| Abdominal        | 139               | 6.1                |
| Cardiac Echo     | 107               | 4.7                |
| <b>Formal US</b> | 1006              |                    |
| Unspecified      | 695               | 69.1               |
| Abdominal        | 146               | 14.5               |
| Pelvic/OB        | 130               | 12.9               |

1  
2  
3 Legend of tables  
4  
5  
6

7 Table 1. Demographics  
8

9 Table 2. Procedures  
10

11 Table 3. Medication classes  
12

13 Table 4. Most Common Medications by Category  
14

15 Table 5. Most Common Medications by Total Doses  
16

17 Table 6. Laboratory studies  
18

19 Table 7. Imaging  
20  
21  
22  
23  
24  
25  
26  
27  
28  
29  
30  
31  
32  
33  
34  
35  
36  
37  
38  
39  
40  
41  
42  
43  
44  
45  
46  
47  
48  
49  
50  
51  
52  
53  
54  
55  
56  
57  
58  
59  
60

# BMJ Open

## What resources are utilized in Emergency Departments in rural sub-Saharan Africa? A retrospective analysis of patient care in a district-level hospital in Uganda

|                                 |                                                                                                                                                                                                                                                                                                                                                                                                                                                                                                                                                                                                            |
|---------------------------------|------------------------------------------------------------------------------------------------------------------------------------------------------------------------------------------------------------------------------------------------------------------------------------------------------------------------------------------------------------------------------------------------------------------------------------------------------------------------------------------------------------------------------------------------------------------------------------------------------------|
| Journal:                        | <i>BMJ Open</i>                                                                                                                                                                                                                                                                                                                                                                                                                                                                                                                                                                                            |
| Manuscript ID                   | bmjopen-2017-019024.R1                                                                                                                                                                                                                                                                                                                                                                                                                                                                                                                                                                                     |
| Article Type:                   | Research                                                                                                                                                                                                                                                                                                                                                                                                                                                                                                                                                                                                   |
| Date Submitted by the Author:   | 09-Nov-2017                                                                                                                                                                                                                                                                                                                                                                                                                                                                                                                                                                                                |
| Complete List of Authors:       | Bitter, Cindy; Saint Louis University, Surgery/Emergency Medicine<br>Rice, Brian; New York University Langone Medical Center, Emergency Medicine<br>Periyannayagam, Usha; harvard humanitarian initiative<br>Dreifuss, Bradley; University of Arizona Arizona Health Sciences Center, Emergency Medicine<br>Hammerstedt, Heather; CEPA-Idaho<br>Nelson, Sara; Maine Medical Center, Emergency Medicine<br>Bisanzo, Mark; University of Massachusetts System,<br>Maling, Samuel; Mbarara University of Science and Technology<br>Chamberlain, Stacey; University of Illinois at Chicago College of Medicine |
| <b>Primary Subject Heading</b>: | Emergency medicine                                                                                                                                                                                                                                                                                                                                                                                                                                                                                                                                                                                         |
| Secondary Subject Heading:      | Global health, Health services research, Medical education and training                                                                                                                                                                                                                                                                                                                                                                                                                                                                                                                                    |
| Keywords:                       | procedural skills, medication formulary, radiology services, point-of-care ultrasound, sub-Saharan Africa, acute care                                                                                                                                                                                                                                                                                                                                                                                                                                                                                      |
|                                 |                                                                                                                                                                                                                                                                                                                                                                                                                                                                                                                                                                                                            |

SCHOLARONE™  
Manuscripts

1  
2  
3 1 **Title:** What resources are utilized in Emergency Departments in rural sub-Saharan Africa? A  
4 2 retrospective analysis of patient care in a district-level hospital in Uganda

5 3 **Authors:**

6 4 Cindy Bitter, MD, MPH

7 5 Department of Surgery, Division of Emergency Medicine, and the College for Public Health &  
8 6 Social Justice, Saint Louis University, Saint Louis MO, USA

9 7  
10 8 Brian Rice, MD, MSc, DTM&H

11 9 Department of Emergency Medicine, New York University School of Medicine, New York NY,  
12 10 USA

13 11 Usha Periyanyagam, MD, MPH, MS

14 12 Harvard Humanitarian Initiative, Harvard University, Boston MA, USA

15 13  
16 14 Bradley Dreifuss, MD

17 15 Department of Emergency Medicine, College of Medicine, and the Department of Health  
18 16 Promotion Sciences, Mel & Enid Zuckerman College of Public Health, University of Arizona,  
19 17 Tucson AZ, USA

20 18 Heather Hammerstedt, MD, MPH

21 19 CEPA-Idaho, Boise ID, USA

22 20 Sara W. Nelson, MD

23 21 Department of Emergency Medicine, Maine Medical Center, Portland ME, USA

24 22 Mark Bisanzo, MD \*\* corresponding author

25 23 Department of Surgery, Division of Emergency Medicine, University of Vermont

26 24 University of Vermont College of Medicine, Department of Surgery

27 25 Fletcher House 301

28 26 111 Colchester Ave

29 27 Burlington VT, USA

30 28 [mbisanzo@gmail.com](mailto:mbisanzo@gmail.com)

31 29 (802) 847-1237

32 30 Samuel Maling, MD

33 31 Dean, College of Medicine, Mbarara University of Science and Technology, Mbarara, Uganda

34 32 Stacey Chamberlain, MD, MPH

35 33 Department of Emergency Medicine and the Center for Global Health, University of Illinois at  
36 34 Chicago, Chicago IL, USA

37 35  
38 36 **Keywords:** procedural skills, medication formulary, radiology services, point-of-care ultrasound,  
39 37 sub-Saharan Africa, acute care

40 38  
41 39 **Word Count: 3375**

1  
2  
3  
4  
5  
6  
7  
8  
9  
10  
11  
12  
13  
14  
15  
16  
17  
18  
19  
20  
21  
22  
23  
24  
25  
26  
27  
28  
29  
30  
31  
32  
33  
34  
35  
36  
37  
38  
39  
40  
41  
42  
43  
44  
45  
46  
47  
48  
49  
50  
51  
52  
53  
54  
55  
56  
57  
58  
59  
60

1  
2 **Abstract**

3 Objectives: To determine the most commonly utilized resources (provider procedural skills,  
4 medications, laboratory studies and imaging) needed to care for patients

5 Setting: A single Emergency Department (ED) of a district level hospital in rural Uganda

6 Participants: 26,710 patient visits

7 Results: Procedures were performed for 65.6% of patients, predominantly intravenous  
8 cannulation, wound care, bladder catheterization, and orthopaedic procedures. Medications were  
9 administered to 87.6% of patients, most often pain medications, antibiotics, IV fluids, anti-  
10 malarians, nutritional supplements, and vaccinations. Laboratory testing was utilized for 85% of  
11 patients, predominantly malaria smears, rapid glucose testing, HIV assays, blood counts,  
12 urinalyses, and blood type. Radiology testing was performed for 17.3% of patients, including X-  
13 rays, point of care ultrasound and formal ultrasound.

14 Conclusion: This study describes the skills and resources needed to care for a large prospective  
15 cohort of patients seen in a district hospital ED in rural sub-Saharan Africa (SSA). It  
16 demonstrates the vast majority of patients were treated with a small formulary of critical  
17 medications and limited access to labs and imaging, but providers require a broad set of decision-  
18 making and procedural skills.

19 **Strengths and limitations of the study:**

20 The study follows a large, multi-year cohort which accounts for seasonal variation in disease  
21 prevalence

22 Data reflect local resource limitations; additional tests and imaging may have been helpful to  
23 optimize patient outcomes

1  
2  
3 1 No assessment was made of the appropriateness of procedures and testing, or whether additional  
4  
5 2 studies might have been indicated  
6  
7  
8 3

9  
10 4 **Introduction:**  
11

12 5 Improving the delivery of acute care services has been proposed as a means strengthen overall  
13 6 health infrastructure by supplementing primary care and reducing fragmentation caused by  
14 7 targeting markers of specific disease processes for improvement.<sup>1</sup> Global research in  
15 8 development of systems for acute and emergency care is hampered by the variety of settings in  
16 9 which emergency care takes place in different parts of the world, poor understanding of the  
17 10 reasons patients seek emergency care, poor standardization of reporting measures, and lack of  
18 11 consensus on the essential services that should be provided.<sup>2</sup> The African Federation of  
19 12 Emergency Medicine (AFEM) has proposed a framework for emergency care development in the  
20 13 region.<sup>3</sup> However, there are few longitudinal evaluations of facility level data that assess the  
21 14 epidemiology of patient presentations, the consumable and non-consumable resources used for  
22 15 care, and the clinical and procedural skills required to deliver emergency care in sub-Saharan  
23 16 Africa (SSA) on which to base these efforts.<sup>4 5 6 7</sup> The limited data that exist are largely from  
24 17 urban areas or describe presentations over a short time frame, introducing possibility of bias,  
25 18 given the seasonal nature of some diseases thought to be prevalent in this area. It is estimated  
26 19 that 62% of the population of SSA lives in rural areas,<sup>8</sup> indicating that data from rural areas are  
27 20 essential to guide emergency care development.  
28  
29  
30  
31  
32  
33  
34  
35  
36  
37  
38  
39  
40  
41  
42  
43  
44  
45  
46  
47  
48  
49  
50  
51  
52

53 22 The uncategorized burden of disease likely contributes to the lack of funding and slow progress  
54 23 of development of emergency care in these countries.<sup>9</sup> While several emergency medicine  
55  
56  
57  
58  
59  
60

1 training programmes have been developed over the past decade<sup>10 11 12 13 14 15</sup> and the African  
2 Federation for Emergency Medicine has developed a Curriculum for Emergency Care training,<sup>16</sup>  
3 the educational content of these efforts has largely been drawn from international guidelines and  
4 expert consensus of foreign emergency physicians and local physicians providing emergency  
5 care in these settings.

6  
7 Lack of information regarding the most frequently utilized procedural skills and the resources  
8 required to care for acutely ill and injured patients hinders the development of emergency care  
9 delivery and training in low resource settings. This study describes the resources and clinical  
10 skills utilized to care for a large, longitudinal cohort of patients presenting to a not-for-profit  
11 district hospital in rural Uganda. It addresses some of the research gaps in service delivery,  
12 resource utilization and training needs necessary to ensure effective emergency care as identified  
13 in a recent consensus statement.<sup>17</sup> This knowledge could inform required training and protocols,  
14 emergency care formulary development, and checklists of useful laboratory resources and  
15 diagnostic imaging modalities to refine the proposed framework for emergency care  
16 development in SSA.<sup>18</sup>

## 17 18 **Methods**

### 19 20 *Study design*

21  
22 This is a retrospective analysis of a prospectively collected data from a quality assurance  
23 database of patients seen at the Karoli Lwanga Hospital Emergency Department (ED) from

1  
2  
3 1 November 2009 through February 2015. The database includes demographic information  
4  
5  
6 2 obtained upon arrival in the ED, as well as diagnostic studies, medications administered, and  
7  
8 3 procedures performed during ED care. Labs, imaging and procedures ordered in the ED but  
9  
10 4 delayed until the patient was admitted to the ward were included, so the numbers reflect the  
11  
12 5 resources that providers felt were needed to care for the patients, regardless of whether the  
13  
14 6 resources were immediately available in the Emergency Department.  
15  
16  
17  
18 7

### 19 8 *Background and Study Setting*

20  
21  
22 9

23  
24 10 Karoli Lwanga Hospital is a private, not-for-profit district hospital located in the town of  
25  
26  
27 11 Nyakibale, in the Rukungiri district of rural southwest Uganda. The district covers 1445 square  
28  
29 12 kilometers, and the 2012 census listed 321,300 persons. Life expectancy is 50 years, compared to  
30  
31 13 a national figure of 58.7 years. The HIV prevalence rate is 8.7% compared to a national rate of  
32  
33 14 7.2%. The maternal mortality rate is 474 per 100,000 live births, compared to a national rate of  
34  
35 15 440 per 100,000. The infant mortality rate is 76 per 1000 live births, compared to national rate of  
36  
37 16 45 per 1000. There are 2 district hospitals in the area, 63 health centers, and 17 private clinics.  
38  
39 17 The nearest referral hospital is in Mbarara, some 110 km away from Nyakibale.<sup>19 20</sup>  
40  
41  
42  
43 18  
44  
45

46 19 Karoli Lwanga Hospital has a six-bed ED with an average census of 500 patients per month. The  
47  
48 20 ED is located centrally in the hospital, adjacent to most wards. The outpatient department (OPD)  
49  
50 21 operates from 9 am to 5 pm Monday through Friday and from 8 am until noon on Saturday.  
51  
52 22 Ambulatory patients are informally triaged, usually by a nurse or clinical officer, and may be  
53  
54 23 referred to the ED based on chief complaint or concerning signs or symptoms noted on patient  
55  
56  
57  
58  
59  
60



1 evaluation. All patients thought to require hospital admission are sent from the OPD to the ED.  
2 In addition, patients who are non-ambulatory, severely ill, or acutely injured are seen in the ED  
3 directly, as are those arriving during hours when OPD is closed. The ED hours varied during the  
4 time of the study, but always began at 8 am and extended until at least 10 pm. For the past  
5 several years, the ED sees patients between 8 am and 2 am. For emergency patients arriving  
6 during overnight hours when the ED is closed, hospital security would phone the on-call  
7 physician or clinical officer. These patients are not included in this study; however, during a six  
8 month period when the ED was open 24 hours a day, only two patients on average arrived  
9 between the hours of 2 and 8 am per day.

10  
11 The ED is staffed by non-physician clinicians locally known as Emergency Care Practitioners  
12 (ECPs); these are nurses who are enrolled in or have completed a two-year training programme  
13 in emergency care. The training program was developed by a U.S.-based non-profit organization,  
14 Global Emergency Care, that has been working to expand emergency care services in Uganda  
15 since 2008, in collaboration with Karoli Lwanga Hospital, Mbarara University of Science and  
16 Technology, and the Ugandan Ministry of Health. During the period of the study, ECPs  
17 transitioned from full-time supervision by EM board-certified/board eligible physicians to more  
18 independent patient care with supervision by senior-level ECPs and intermittent supervision by  
19 EM physicians. This training programme and care delivery model have been described in more  
20 depth elsewhere.<sup>21 22</sup> Hospital-based Ugandan physicians were on call for consultation for acute  
21 surgical emergencies and severely ill patients requiring admission.

22  
23 *Data collection and Analysis*

1  
2  
3 1  
4  
5 2 The study population includes all ED patient visits from November 14, 2009 through February  
6  
7 3 28, 2015. The start date reflects the initial day that data were collected on ED patients, which  
8  
9 4 was approximately 4 months after the initial training of the ECPs began. Orders were placed by  
10  
11 5 ECPs on a structured hand-written chart; this information was prospectively entered into the  
12  
13 6 quality assurance database by a trained research assistant at the time of ED disposition.  
14  
15 7 Additionally, during most of the time period, the paper charts were scanned and securely saved  
16  
17 8 as part of the QA processes. The QA database tracked 31 fields including demographics, vital  
18  
19 9 signs, chief complaint, lab studies, imaging, medications administered, procedures performed,  
20  
21 10 final diagnosis, disposition and condition on discharge. As this is the first programme to utilize  
22  
23 11 task-shifting for provision of emergency care in SSA, the QA database was created to monitor  
24  
25 12 patient presentations and outcomes, to better characterize acute care needs, and to improve  
26  
27 13 programme operations and educational content.  
28  
29  
30  
31  
32  
33  
34  
35

36 15 Data collection initially utilized Microsoft Excel (Microsoft, Redmond WA, USA) and was  
37  
38 16 transitioned to Microsoft Access in March 2012. The database was de-identified prior to  
39  
40 17 analysis. Data were merged and analyzed in Stata Statistical Software Version 13 (Stata  
41  
42 18 Statistical Software: Release 13, College Station, TX: StataCorp LP). The data were formatted  
43  
44 19 and cleaned, and the variables of interest were abstracted from the general database prior to  
45  
46 20 analysis by a single researcher. Descriptive tables of the most common skills and resources were  
47  
48 21 created.  
49  
50  
51  
52

53 22  
54  
55 23 *Ethical review*  
56  
57  
58  
59  
60

This study was approved by the Mbarara University of Science and Technology Institutional Review Board, the Uganda National Council for Science and Technology, and University of Massachusetts Institutional Review Board (reference number HS 1405). Local approval was obtained from the medical superintendent of the hospital.

## Results

The cohort includes a total of 26,710 patient visits. Males accounted for 14,720 (55.1%) visits. Paediatric patients under 5 years of age were 20.5% of total visits, and patients aged 5-17 were 16.2% of visits. Adults 18-65 years accounted for 50.6% of visits, and elders over 65 accounted for 12.4% of visits (Table 1).

| <b>Table 1<br/>Demographics</b> |        |         |
|---------------------------------|--------|---------|
|                                 | number | percent |
| <b>Sex</b>                      |        |         |
| Male                            | 14,720 | 55.1    |
| Female                          | 11,934 | 44.7    |
| Unspecified                     | 56     | 0.2     |
| <b>Age</b>                      |        |         |
| Children under 5 years          | 5,478  | 20.5    |
| Paediatric 5-17 years           | 4,337  | 16.2    |
| Adult 18-65 years               | 13,510 | 50.6    |
| Elderly >65 years               | 3,305  | 12.4    |

1 One or more procedures were performed during 17,509 (65.6%) patient visits, with a total of  
 2 22,729 procedures performed. Multiple procedures were required for 3601 (14.8%) patient visits  
 3 with a mean of 1.3 and a maximum of 7 procedures among those who required a procedure. The  
 4 most common procedure performed was IV cannulation. Wound care procedures were next,  
 5 followed by bladder catheterization, splinting and immobilization, procedural sedation, lumbar  
 6 punctures, and incision and drainage of abscesses. (Table 2).

**Table 2**  
**Procedures**

| Procedure               | Number | Percent of procedures | Percent of cohort |
|-------------------------|--------|-----------------------|-------------------|
| IV                      | 9,161  | 40.3                  | 34.2              |
| Wound care              | 7,246  | 31.9                  | 27.1              |
| Catheter                | 1,523  | 6.7                   | 5.7               |
| Splint & immobilization | 743    | 3.3                   | 2.8               |
| Procedural sedation     | 663    | 2.9                   | 2.5               |
| Lumbar puncture         | 513    | 2.3                   | 2.0               |
| I & D                   | 511    | 2.2                   | 1.9               |

12 A total of 73,317 doses of medications were administered. Medications were used for 23,401  
 13 (87.6%) patient visits, with 20,705 (77.5%) receiving more than one medication. The most  
 14 common class of medications used was analgesics, including acetaminophen, non-steroidal anti-  
 15 inflammatory, and opioid analgesics. The next most common class prescribed was antibiotics,  
 16 followed by antimalarials, intravenous fluids, and nutritional supplements. Approximately 1800  
 17 medications could not be classified due to misspellings or non-standard abbreviations.  
 18 Medication categories are listed in Table 3, and the most commonly used medications from each

1 category are listed in Table 4. Specific medications given to more than 0.5% of the patient cohort  
2 are listed in Table 5.

**Table 3**  
**Medications by Category**

| Medication class | Doses  | Percent of medications given |
|------------------|--------|------------------------------|
| Analgesics       | 22,981 | 31.4                         |
| Antibiotics      | 14,486 | 19.8                         |
| Antimalarials    | 5,495  | 7.5                          |
| IV fluids        | 5,445  | 7.4                          |
| Nutritional      | 4,785  | 6.5                          |
| Respiratory      | 3,394  | 4.6                          |
| GI               | 2,584  | 3.5                          |
| CNS/Neuro        | 2,495  | 3.4                          |
| Cardiac          | 2,489  | 3.4                          |
| Vaccines         | 1,984  | 2.7                          |

**Table 4**  
**Most Common Medications by Category**

| Class                          | examples                      |                |                      |                                  |
|--------------------------------|-------------------------------|----------------|----------------------|----------------------------------|
| <b>Analgesics</b>              | paracetamol/<br>acetaminophen | diclofenac     | tramadol             | Pethidine/<br>meperidine         |
| <b>Antibiotics</b>             | ceftriaxone                   | cloxacillin    | gentamicin           | metronidazole                    |
| <b>Antimalarials</b>           | artemether/<br>lumefantrine   | quinine        | artesunate           | sulfadoxine/<br>pyrimethamine    |
| <b>Nutritional supplements</b> | dextrose                      | ORT            | multivitamin         | ready-to-use<br>therapeutic food |
| <b>Respiratory</b>             | oxygen                        | salbutamol     | cough<br>suppressant | nebulized<br>magnesium           |
| <b>GI</b>                      | omeprazole                    | metoclopramide | ranitidine           | bisacodyl                        |
| <b>CNS</b>                     | diazepam                      | haloperidol    | mannitol             | amitriptyline                    |
| <b>Cardiac</b>                 | furosemide                    | nifedipine     | aspirin              | digoxin                          |

**Table 5**  
**Most Common Medications by Number of Doses**

| Medication       | Doses  | Percent of medications |
|------------------|--------|------------------------|
| Paracetamol      | 14,697 | 20.0                   |
| Ceftriaxone      | 4,697  | 6.41                   |
| Diclofenac       | 4,508  | 6.2                    |
| Normal saline    | 3,672  | 5.0                    |
| Coartem          | 3,542  | 4.8                    |
| Tetanus vaccine  | 1,862  | 2.5                    |
| Tramadol         | 1,842  | 2.5                    |
| Quinine          | 1,775  | 2.4                    |
| Cloxacillin      | 1,686  | 2.3                    |
| Gentamicin       | 1,602  | 2.2                    |
| Ringers' lactate | 1,446  | 2.0                    |

Laboratory tests were ordered for 22,708 (85.0%) patient visits, with a total of 38,378 studies being performed. The most common study was malaria testing, done in 14,440 (54.0%) patient visits. Bedside glucose was checked in 5666 (21.2%) patient visits. HIV testing was done in 5195 (19.4%) patient visits with CD4 testing for 465 (1.7%). Haemoglobin was run for 4108 (15.4%) patient visits. Urinalysis was performed for 3062 (11.5%) patient visits. Blood type was checked for 1366 (5.1%) patient visits. (Table 6)

**Table 6**  
**Laboratory Testing**

| Medication    | Doses  | Percent of medications |
|---------------|--------|------------------------|
| Paracetamol   | 14,697 | 20.0                   |
| Ceftriaxone   | 4,697  | 6.41                   |
| Diclofenac    | 4,508  | 6.2                    |
| Normal saline | 3,672  | 5.0                    |
| Coartem       | 3,542  | 4.8                    |

|                  |       |     |
|------------------|-------|-----|
| Tetanus vaccine  | 1,862 | 2.5 |
| Tramadol         | 1,842 | 2.5 |
| Quinine          | 1,775 | 2.4 |
| Cloxacillin      | 1,686 | 2.3 |
| Gentamicin       | 1,602 | 2.2 |
| Ringers' lactate | 1,446 | 2.0 |

Radiology studies were performed for 4630 (17.3%) patient visits. X-rays were performed or ordered on 1864 (7.0%) patient visits. The most common X-ray was a chest X-ray, done for 1071 patient visits (4.0% of the cohort, 45.6% of all X-rays requested.) Other X-rays included 477 lower and 275 upper extremity films, 89 pelvis films, 88 skull films, and 73 abdominal films. X-rays were available only when a radiology technician was present, mostly weekday business hours, but with some call-in capacity on evenings and weekends. Point of care ultrasound (POCUS) was performed on 2194 (8.2%) patient visits including 417 focused assessment with sonography in trauma (FAST) exams, 139 abdominal studies, 107 echocardiograms, and 73 transabdominal exams for obstetric or gynecological indications. Formal ultrasound imaging by the hospital radiology technician was requested for 998 (3.7%) patient visits. (Table 7)

**Table 7**  
**Imaging**

|              | Number of Studies | Percent of Imaging |
|--------------|-------------------|--------------------|
| <b>X-ray</b> | 2441              |                    |
| Chest        | 1071              | 43.9               |
| Arm          | 477               | 19.5               |
| Leg          | 275               | 11.3               |
| Unspecified  | 150               | 6.1                |
| Pelvis       | 89                | 3.6                |
| Skull        | 88                | 3.6                |
| Abdomen      | 73                | 3.0                |
| <b>POCUS</b> | 2289              |                    |
| Unspecified  | 1465              | 64.0               |

|                  |      |      |
|------------------|------|------|
| FAST             | 417  | 18.2 |
| Abdominal        | 139  | 6.1  |
| Cardiac Echo     | 107  | 4.7  |
| <b>Formal US</b> | 1006 |      |
| Unspecified      | 695  | 69.1 |
| Abdominal        | 146  | 14.5 |
| Pelvic/OB        | 130  | 12.9 |

## 14 **Limitations**

19 4 This is a single center study in rural Uganda with a unique training programme that was  
 20  
 21 5 developed after a needs assessment of the burden of disease,<sup>23</sup> but which took into account  
 22  
 23 6 resource limitations at Karoli Lwanga Hospital. Thus, it is possible our analysis failed to  
 24  
 25 7 document potentially useful resources that were not available, thus were not part of the ECPs  
 26  
 27 8 training. Other analyses of smaller portions of this data set looking at common diagnoses can  
 28  
 29 9 help temper this limitation to some degree.<sup>24</sup> Practice patterns and proficiencies of the ECPs  
 30  
 31 10 may not be representative of other clinicians. Increased availability of the X-ray technician  
 32  
 33 11 would likely have increased the number of patients undergoing imaging in the ED. CT imaging  
 34  
 35 12 could aid in managing head trauma and some abdominal injuries but is not available at the site;  
 36  
 37 13 however, this is true in most district hospitals in SSA. Likewise, there may be additional  
 38  
 39 14 laboratory tests that would be useful but were not available routinely during study period or were  
 40  
 41 15 subject to “stock-outs” of necessary reagents. While we did record tests ordered but not  
 42  
 43 16 completed, if ECPs were aware of the stock-out, they may not have ordered a test even if they  
 44  
 45 17 felt was indicated. Given the retrospective nature of this review, we do not have a way of  
 46  
 47 18 controlling for this lack of ordering due to knowledge of stock-outs.  
 48  
 49  
 50  
 51  
 52  
 53  
 54  
 55  
 56  
 57  
 58  
 59  
 60



1 Free text entry of data by non-medically trained research assistants resulted in a small amount of  
2 data being lost due to misspelling or incorrect transcription. Modifications to the data entry  
3 process have since reduced such errors. Additionally, patients arriving in the overnight hours  
4 when the ED was closed were not included in this analysis. Finally, there was no gold standard  
5 arbitration done to assess the true “need” for the interventions performed or to critique other  
6 interventions that might have been indicated. Nonetheless, this provides a pragmatic assessment  
7 of the real-world practice of emergency care at a district hospital in a rural area of SSA.

## 9 Discussion

10  
11 This is a longitudinal cohort of 26,710 acutely ill patient visits cared for in a rural emergency  
12 department in sub-Saharan Africa. The study builds on the work of previous authors in several  
13 important ways. First, to our knowledge, this is largest data set of emergencies presenting to a  
14 rural district hospital in a low-resource country. Additionally, we report detailed information on  
15 procedures performed and resources used for care in this large cohort over a five-year period. To  
16 deliver effective emergency care, ongoing research is required to further elucidate both training  
17 and resource needs in resource-limited settings. By documenting current practice patterns of  
18 emergency care in a functional ED in rural Uganda, the data could inform training and resource  
19 allocation for providers in similar settings.

20  
21 In considering medical knowledge that should be included in emergency care training, the  
22 spectrum of diseases presenting acutely must be understood. Data from the Global Burden of  
23 Disease Study indicate an increasing contribution of non-communicable disease towards

1 worldwide mortality,<sup>25</sup> but it is unknown how much these diseases contribute to the burden of  
2 emergencies in SSA. The data show that ECPs cared for patients across all age ranges who  
3 presented with diverse complaints. Commonly utilized medications and diagnostic tests indicate  
4 that patients presented for emergency care with a broad array of communicable and non-  
5 communicable diseases. Our data suggest that even in rural areas with high rates of  
6 communicable diseases, non-communicable diseases contribute significantly to the need for  
7 acute care. Additionally, given the fact that analgesics were given to 31.4% of patients and  
8 approximately 2.5% of patients underwent procedural sedation, it can be inferred that the ECPs  
9 managed a large burden of acutely painful conditions. High rates of splinting and  
10 immobilization, as well as the number of FAST exams performed, indicate trauma care is a  
11 prominent component of emergency care in this setting. This is consistent with Uzoechina et al.'s  
12 study from Nigeria and Wachira et al.'s data from Kenya.

13  
14 Skills such as X-ray interpretation and point of care ultrasound (POCUS) appear to be high yield,  
15 given X-rays were performed on 7.0% and POCUS on 8.2% of patient visits. POCUS has been  
16 shown in other studies to supplement limited radiography capacity and enhance safety of  
17 invasive procedures in resource limited settings.<sup>26 27 28</sup> The ECP training on POCUS has  
18 increased over time and is described elsewhere.<sup>29</sup>

19  
20 The variety of procedures performed indicates that providers in the setting likely require a broad  
21 range of procedural skills. Peripheral IV access was the norm, but occasional patients required  
22 intra-osseous access or cannulation of the external jugular vein. In addition to the common  
23 procedures listed above, the ECPs are trained to perform paracenteses, thoracenteses, joint

1 aspirations, and nerve blocks. While these procedures are required relatively infrequently, they  
2 are crucial for symptomatic relief, making the diagnosis, and guiding treatment for a significant  
3 proportion of patients seen in rural EDs in SSA. The ability to perform these procedures in a  
4 timely manner is required to deliver effective, quality emergency care.

5  
6 Resource allocation and preparation is the other essential component for effective emergency  
7 care delivery. Based on the AFEM framework, Karoli Lwanga Hospital should be an  
8 “intermediate facility”. In the framework, signal functions are defined as “lifesaving saving  
9 clinical interventions,” and a consensus-based list of these functions was generated. While our  
10 study did not seek to specifically map which signal functions the ECPs carried out, comparing  
11 the list of signal functions with medications administered, procedures performed, and laboratory  
12 and diagnostic imaging testing used in our cohort, it is clear there is significant overlap between  
13 the framework and the real-world practice of emergency care in this setting.

14  
15 The medications most frequently used were pain medications, antibiotics, antimalarials, IV  
16 fluids, nutritional supplements, respiratory medications, and cardiac medications. These  
17 medications are on the World Health Organization Model List of Essential Medications<sup>30</sup> and are  
18 expected to be widely available. Approximately 13% of patients received vaccinations as part of  
19 their emergency care, highlighting another health-systems strengthening role of emergency care,  
20 in providing an additional venue for primary prevention. It is also encouraging to see some  
21 evidence that patients’ pain was addressed, as pain assessment and management has been  
22 identified as a deficit in prior studies.<sup>31</sup>

23

1  
2  
3 1 There currently is no widely recognized list of essential emergency laboratory tests in low  
4  
5 2 resource settings, although the WHO is currently in the process of developing a consensus-based  
6  
7 3 minimum package for this. From our data, it appears that point of care blood glucose testing,  
8  
9 4 malaria smears (or rapid diagnostic malaria tests), assessment of haemoglobin, blood typing,  
10  
11 5 HIV testing and fluid analysis (CSF, urine, pleural fluid, ascites, and joint aspirates) are all  
12  
13 6 commonly used. While used to a lesser extent, our database and clinical experience indicated  
14  
15 7 pregnancy testing is important in this setting as well. The ability to perform HIV screening is  
16  
17 8 critical. Uganda adopted a national guideline recommending opt-out testing in 2005,<sup>32</sup> but missed  
18  
19 9 opportunities for early diagnosis and initiation of antiretroviral treatment in difficult to reach  
20  
21 10 populations persist.<sup>33 34 35</sup> Due to stock-outs and lack of point of care testing performed by ECPs,  
22  
23 11 this cohort of patients had a much lower rate of HIV testing than guidelines recommend. Testing  
24  
25 12 for HIV in the acute care setting offers patients a pathway to access the HIV continuum of care  
26  
27 13 and begin treatment at an earlier stage in the diagnosis, which in turn has been shown to make  
28  
29 14 management more effective and to reduce HIV transmission and the future burden of disease.<sup>36</sup>  
30  
31 15 <sup>37</sup>  
32  
33 16 Future directions for research include comparing data from this facility with training needs and  
34  
35 17 resource allocation at other facilities in SSA. Additionally, formally assessing the use of signal  
36  
37 18 functions in this cohort could help refine the framework proposed to guide emergency care  
38  
39 19 implementation in SSA.  
40  
41  
42  
43  
44  
45  
46  
47  
48  
49  
50  
51  
52  
53  
54  
55  
56  
57  
58  
59  
60

## 21 **Conclusions**

1 This study tracks the resources utilized to diagnose, stabilize and treat a large cohort of  
2 consecutive patients seen in a not-for-profit, rural district ED in SSA. Analysis of the resources  
3 used and knowledge and skills applied to care for this patient cohort provides a rare glimpse of  
4 what emergency care delivery entails in rural SSA. The results of this study coupled with the  
5 previously developed framework to guide emergency care implementation will enable bench-  
6 marking and data-driven policy making for improvement of facility-based emergency care  
7 delivery in low resources settings within sub-Saharan Africa.

8 **Author Contributions:** CB, BR and UP performed data cleaning, statistical analysis and  
9 submission of this work. HH, SC, and MB inputted the data into the database. UP and SC  
10 conceived and designed the study and supervised all portions of the study. CB, SC and UP  
11 drafted the manuscript and all authors revised it. SM provided program support for ECP  
12 curriculum development and contributed to study design. All authors take responsibility for the  
13 paper as a whole.

15 **Competing Interests:** The authors have no conflicts of interest to report

16 **Funding:** GEC is a non-profit organization and operates largely on private donations and small  
17 family foundation grants. The authors did not receive funding for this study.

19 **Data Sharing:** files will not be available for sharing

1  
2  
3 1  
4 2  
5  
6  
7  
8  
9  
10  
11  
12  
13  
14  
15  
16  
17  
18  
19  
20  
21  
22  
23  
24  
25  
26  
27  
28  
29  
30  
31  
32  
33  
34  
35  
36  
37  
38  
39  
40  
41  
42  
43  
44  
45  
46  
47  
48  
49  
50  
51  
52  
53  
54  
55  
56  
57  
58  
59  
60

## References

- <sup>1</sup> Hirshon JM, Risko N, Calvello, EJ, et al. Health systems and services: the role of acute care. *Bull World Health Organ.* 2013; 91(5): 386-388.
- <sup>2</sup> Obermeyer Z, Abujaber S, Makar M, et al. Emergency care in 59 low- and middle-income countries: a systematic review. *Bull World Health Organ.* 2015;93:577-586G.
- <sup>3</sup> Calvello E, Reynolds T, Hirshon JM, et al. Emergency care in sub-Saharan Africa: Results of a consensus conference. *AfJEM.* 2013; 3(1): 42-48.
- <sup>4</sup> Wen L, Char D. Existing infrastructure for the delivery of emergency care in post-conflict Rwanda: An initial descriptive study. *AfJEM.* 2011; 1: 57-61.
- <sup>5</sup> Uzochina NS, Abiola AQ, Akodu BA, et al. Pattern and outcome of cases seen at the Adult Accident and Emergency Department of the Lagos University Teaching Hospital, Idi-Araba, Lagos. *Nig Q J Hosp Med.* 2012; 22(3): 209-15.
- <sup>6</sup> Wachira B, Wallis L, Geduld H. An analysis of the clinical practice of emergency medicine in public emergency departments in Kenya. *Emerg Med J.* 2012; 29: 473-476.
- <sup>7</sup> Periyanyagam U, Dreifuss B, Hammerstedt H, et al. Acute care needs in a rural sub-Saharan African Emergency Center: A retrospective analysis. *AfJEM.* 2012; 2(4): 151-158.
- <sup>8</sup> World Bank. Rural population. 2016. Retrieved from [www.data.worldbank.org/indicator/SP.RUR.TOTL.ZS](http://www.data.worldbank.org/indicator/SP.RUR.TOTL.ZS) on September 25, 2016.
- <sup>9</sup> Reynolds TA, Calvello EJB, Broccoli MC et al. AFEM consensus conference 2013 summary: Emergency care in Africa – Where are we now? *AfJEM.* 2014; 4(3):158-63.
- <sup>10</sup> Wen LS, Geduld HI, Nagurney JT, Wallis LA. Africa's First Emergency Medicine Training Program at the University of Cape Town/Stellenbosch University: History, Progress, and Lessons Learned. *Acad Emerg Med.* 2011;18(8): 868-871.
- <sup>11</sup> Kabeza A, George N, Nyundo M, Levine A. Development of emergency medicine in Rwanda. *AfJEM.* 2013; 3: 103-109.
- <sup>12</sup> Busse H, Azazh A, Teklu S, et al. Creating Change Through Collaboration: A Twinning Partnership to Strengthen Emergency Medicine at Addis Ababa University/Tikur Anbessa Specialized Hospital - A Model for International Medical Education Partnerships. *Acad Emerg Med.* 2013; 20: 1310-1318.
- <sup>13</sup> Martel J, Oteng R, Mould-Millman NK, et al. The development of sustainable emergency care in Ghana: physician, nursing, and prehospital care training initiatives. *J Emerg Med.* 2014; 47(4): 462-468.
- <sup>14</sup> Hammerstedt H, Maling S, Kasyaba R, et al. Addressing World Health Assembly Resolution 60.22: A Pilot Project to Create Access to Acute Care Services in Uganda. *Ann Emerg Med.* 2014; 64: 461-468.
- <sup>15</sup> A-Rahman NH, Jacquet GA. The state of emergency care in the Republic of the Sudan. *AfJEM.* 2014; 4(2):55-60.
- <sup>16</sup> African Federation for Emergency Medicine. Emergency Care Curriculum. Retrieved from [www.afem.info/resources/afem-curriculum/?id+73%27A](http://www.afem.info/resources/afem-curriculum/?id+73%27A) on November 28, 2016.
- <sup>17</sup> Calvello, EJB, Broccoli M, Risko N, et al. Emergency Care and Health Systems: Consensus-based Recommendations and Future Research Priorities. *Acad Emerg Med.* 2013; 20: 1278-1288.
- <sup>18</sup> Calvello, EJB, Tenner AG, Broccoli MC et al. Operationalising emergency care delivery in sub-Saharan Africa: consensus-based recommendations for healthcare facilities. *Emerg Med J.* 2016;33(8):573-80.

- 1  
2  
3  
4  
5  
6  
7  
8  
9  
10  
11  
12  
13  
14  
15  
16  
17  
18  
19  
20  
21  
22  
23  
24  
25  
26  
27  
28  
29  
30  
31  
32  
33  
34  
35  
36  
37  
38  
39  
40  
41  
42  
43  
44  
45  
46  
47  
48  
49  
50  
51  
52  
53  
54  
55  
56  
57  
58  
59  
60
- 
- <sup>19</sup> Uganda Bureau of Statistics 2016. The National Population and Housing Census 2014. Subcounty Report – Central Region. Available at [www.ubos.org](http://www.ubos.org)
- <sup>20</sup> United Nations Children’s Fund. Uganda Country Statistics. Available at [www.unicef.org/infobycountry/uganda\\_statistics.html](http://www.unicef.org/infobycountry/uganda_statistics.html)
- <sup>21</sup> Hammerstedt H, Maling S, Kasyaba R, et al. Addressing World Health Assembly Resolution 60.22: A Pilot Project to Create Access to Acute Care Services in Uganda. *Ann Emerg Med*. 2014; 64: 461-468.
- <sup>22</sup> Rice B, Periyanyagam U, Chamberlain S, et al. Mortality in Children Under Five Receiving Nonphysician Clinician Emergency Care in Uganda. *Pediatrics*. 2016; 137(3): e20153201 doi: 10.1542/peds.2015.3201.
- <sup>23</sup> Periyanyagam U, Dreifuss B, Hammerstedt H, et al. Acute care needs in a rural sub-Saharan African Emergency Center: A retrospective analysis. *AfJEM*. 2012; 2(4): 151-158.
- <sup>24</sup> Chamberlain S, Stolz U, Dreifuss B, et al. Mortality Related to Acute Illness and Injury in Rural Uganda: Task Shifting to Improve Outcomes. *PLoS One*. 2015;10(4):e0122559.
- <sup>25</sup> GBD 2015 Mortality and Causes of Death Collaborators. Global, regional, and national life expectancy, all-cause mortality, and cause-specific mortality for 249 causes of death, 1980-2015: a systematic analysis for the Global Burden of Disease Study 2015. *Lancet*. 2016;388:1459-544.
- <sup>26</sup> Sipple S, Muruganandan K, Levine A, Shah S. Review article: Use of ultrasound in the developing world. *Int J Emerg Med*. 2011; 4: 72.
- <sup>27</sup> Chavez MA, Naithani N, Gilman RH et al. Agreement Between the World Health Organization Algorithm and Lung Consolidation Identified Using Point-of-Care Ultrasound for the Diagnosis of Childhood Pneumonia by General Practitioners. *Lung*. 2015; 193(4): 531-538.
- <sup>28</sup> Becker DM, Tafoya CA, Becker SL, Kruger GH, Tafoya MJ, Becker TK. The use of portable ultrasound devices in low- and middle-income countries: a systematic review of the literature. *Trop Med Int Health*. 2016; 21(3): 294-311.
- <sup>29</sup> Chanler-Berat J, Birungi A, Dreifuss B, Mbiine R. Typhoid intestinal perforation: Point-of-care ultrasound as a diagnostic tool in a rural Ugandan hospital. *AfJEM*. 2019;6(1):44-6.
- <sup>30</sup> World Health Organization. WHO Model List of Essential Medications. 2015.
- <sup>31</sup> Wachira et al, op cit.
- <sup>32</sup> Uganda Ministry of Health. Uganda national policy guidelines for HIV counseling and testing 2005. Retrieved from [www.who.int/hiv/pub.guidelines/uganda\\_art.pdf](http://www.who.int/hiv/pub.guidelines/uganda_art.pdf) on September 25, 2016.
- <sup>33</sup> Nakanjako D, Kanya M, Mayanja-Kizza H, Freers J, Whalen C, Katabira E. Acceptance of routine testing for HIV among adult patients at the medical emergency unit at a national referral hospital in Kampala, Uganda. *AIDS Behav*. 2007; 11(5): 753-758.
- <sup>34</sup> Larsson EC, Thorson A, Pariyo G, et al. Opt-out HIV testing during antenatal care: experiences of pregnant women in rural Uganda. *Health Policy and Planning*. 2012; 27(1): 69-75.
- <sup>35</sup> Obermeeyer CM, Bott S, Bayer R, Desclaux, Baggaley R, MATCH Study Group. HIV testing and care in Burkina Faso, Kenya, Malawi and Uganda: ethics on the ground. *BMC Int Health Hum Rights*. 2013; 13:6.
- <sup>36</sup> Donnell D, Baeten JM, Kiarie J, et al. Heterosexual HIV-1 transmission after initiation of antiretroviral therapy: a prospective cohort analysis. *Lancet*. 2010; 375(9831): 2092-2098.
- <sup>37</sup> Gardner EM, Haukoos JS. At the Crossroads of the HIV Care Continuum: Emergency Departments and the HIV Epidemic. *Ann Emerg Med*. 2015;66(1):79-81. doi:10.1016/j.annemergmed.2015.04.032.

STROBE Statement—checklist of items that should be included in reports of observational studies

|                              | Item No. | Recommendation                                                                                                                                                                             | Page No. | Relevant text from manuscript |
|------------------------------|----------|--------------------------------------------------------------------------------------------------------------------------------------------------------------------------------------------|----------|-------------------------------|
| <b>Title and abstract</b>    | 1        | (a) Indicate the study’s design with a commonly used term in the title or the abstract                                                                                                     | 2        |                               |
|                              |          | (b) Provide in the abstract an informative and balanced summary of what was done and what was found                                                                                        | 2        |                               |
| <b>Introduction</b>          |          |                                                                                                                                                                                            |          |                               |
| Background/rationale         | 2        | Explain the scientific background and rationale for the investigation being reported                                                                                                       | 3-4      |                               |
| Objectives                   | 3        | State specific objectives, including any prespecified hypotheses                                                                                                                           |          |                               |
| <b>Methods</b>               |          |                                                                                                                                                                                            |          |                               |
| Study design                 | 4        | Present key elements of study design early in the paper                                                                                                                                    | 4-5      |                               |
| Setting                      | 5        | Describe the setting, locations, and relevant dates, including periods of recruitment, exposure, follow-up, and data collection                                                            | 4-5      |                               |
| Participants                 | 6        | (a) <i>Cohort study</i> —Give the eligibility criteria, and the sources and methods of selection of participants. Describe methods of follow-up                                            | 7        |                               |
|                              |          | <i>Case-control study</i> —Give the eligibility criteria, and the sources and methods of case ascertainment and control selection. Give the rationale for the choice of cases and controls |          |                               |
|                              |          | <i>Cross-sectional study</i> —Give the eligibility criteria, and the sources and methods of selection of participants                                                                      |          |                               |
|                              |          | (b) <i>Cohort study</i> —For matched studies, give matching criteria and number of exposed and unexposed                                                                                   |          |                               |
|                              |          | <i>Case-control study</i> —For matched studies, give matching criteria and the number of controls per case                                                                                 |          |                               |
| Variables                    | 7        | Clearly define all outcomes, exposures, predictors, potential confounders, and effect modifiers. Give diagnostic criteria, if applicable                                                   | n/a      |                               |
| Data sources/<br>measurement | 8*       | For each variable of interest, give sources of data and details of methods of assessment (measurement). Describe comparability of assessment methods if there is more than one group       | 8-10     |                               |
| Bias                         | 9        | Describe any efforts to address potential sources of bias                                                                                                                                  | 10-11    |                               |
| Study size                   | 10       | Explain how the study size was arrived at                                                                                                                                                  | 4-5      |                               |

Continued on next page



|                        |     |                                                                                                                                                                                                              |      |
|------------------------|-----|--------------------------------------------------------------------------------------------------------------------------------------------------------------------------------------------------------------|------|
| Quantitative variables | 11  | Explain how quantitative variables were handled in the analyses. If applicable, describe which groupings were chosen and why                                                                                 | 8-10 |
| Statistical methods    | 12  | (a) Describe all statistical methods, including those used to control for confounding                                                                                                                        | 7    |
|                        |     | (b) Describe any methods used to examine subgroups and interactions                                                                                                                                          | n/a  |
|                        |     | (c) Explain how missing data were addressed                                                                                                                                                                  | 10   |
|                        |     | (d) <i>Cohort study</i> —If applicable, explain how loss to follow-up was addressed                                                                                                                          |      |
|                        |     | <i>Case-control study</i> —If applicable, explain how matching of cases and controls was addressed                                                                                                           |      |
|                        |     | <i>Cross-sectional study</i> —If applicable, describe analytical methods taking account of sampling strategy                                                                                                 |      |
|                        |     | (e) Describe any sensitivity analyses                                                                                                                                                                        |      |
| <b>Results</b>         |     |                                                                                                                                                                                                              |      |
| Participants           | 13* | (a) Report numbers of individuals at each stage of study—eg numbers potentially eligible, examined for eligibility, confirmed eligible, included in the study, completing follow-up, and analysed            | n/a  |
|                        |     | (b) Give reasons for non-participation at each stage                                                                                                                                                         |      |
|                        |     | (c) Consider use of a flow diagram                                                                                                                                                                           |      |
| Descriptive data       | 14* | (a) Give characteristics of study participants (eg demographic, clinical, social) and information on exposures and potential confounders                                                                     | 8    |
|                        |     | (b) Indicate number of participants with missing data for each variable of interest                                                                                                                          |      |
|                        |     | (c) <i>Cohort study</i> —Summarise follow-up time (eg, average and total amount)                                                                                                                             |      |
| Outcome data           | 15* | <i>Cohort study</i> —Report numbers of outcome events or summary measures over time                                                                                                                          | 8-10 |
|                        |     | <i>Case-control study</i> —Report numbers in each exposure category, or summary measures of exposure                                                                                                         |      |
|                        |     | <i>Cross-sectional study</i> —Report numbers of outcome events or summary measures                                                                                                                           |      |
| Main results           | 16  | (a) Give unadjusted estimates and, if applicable, confounder-adjusted estimates and their precision (eg, 95% confidence interval). Make clear which confounders were adjusted for and why they were included | 8-10 |
|                        |     | (b) Report category boundaries when continuous variables were categorized                                                                                                                                    |      |
|                        |     | (c) If relevant, consider translating estimates of relative risk into absolute risk for a meaningful time period                                                                                             |      |

Continued on next page

|                          |    |                                                                                                                                                                            |       |
|--------------------------|----|----------------------------------------------------------------------------------------------------------------------------------------------------------------------------|-------|
| Other analyses           | 17 | Report other analyses done—eg analyses of subgroups and interactions, and sensitivity analyses                                                                             | n/a   |
| <b>Discussion</b>        |    |                                                                                                                                                                            |       |
| Key results              | 18 | Summarise key results with reference to study objectives                                                                                                                   | 11-12 |
| Limitations              | 19 | Discuss limitations of the study, taking into account sources of potential bias or imprecision. Discuss both direction and magnitude of any potential bias                 | 10-11 |
| Interpretation           | 20 | Give a cautious overall interpretation of results considering objectives, limitations, multiplicity of analyses, results from similar studies, and other relevant evidence | 11-14 |
| Generalisability         | 21 | Discuss the generalisability (external validity) of the study results                                                                                                      | 11-14 |
| <b>Other information</b> |    |                                                                                                                                                                            |       |
| Funding                  | 22 | Give the source of funding and the role of the funders for the present study and, if applicable, for the original study on which the present article is based              | 15    |

\*Give information separately for cases and controls in case-control studies and, if applicable, for exposed and unexposed groups in cohort and cross-sectional studies.

**Note:** An Explanation and Elaboration article discusses each checklist item and gives methodological background and published examples of transparent reporting. The STROBE checklist is best used in conjunction with this article (freely available on the Web sites of PLoS Medicine at <http://www.plosmedicine.org/>, Annals of Internal Medicine at <http://www.annals.org/>, and Epidemiology at <http://www.epidem.com/>). Information on the STROBE Initiative is available at [www.strobe-statement.org](http://www.strobe-statement.org).
